# Supplementary material for: Easy fabrication of l-glutamic acid/ZnS composites for efficient photo-catalytic and supercapacitor performance
Source: Royal Society of Chemistry journal article supplement (doi:10.1039/d3ra03633b), 2023-01-01
Supplement: d3ra03633b1.pdf [file d3ra03633b1.pdf]

### Supplementary Figure

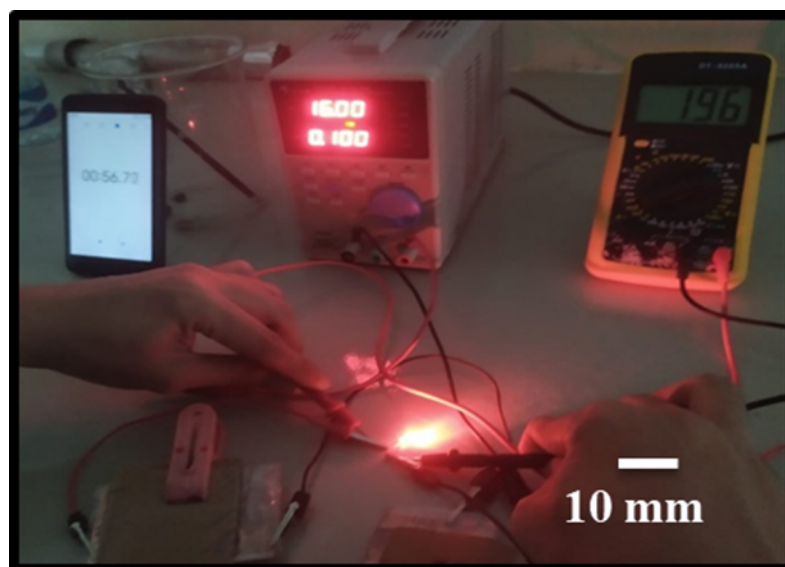

**Fig. S1.** Charge storage capacity and lighted up of one red LED using L-GA/ZnS composites electrode.
